# Supplementary material for: Virological footprint of CD4+ T-cell responses during chronic hepatitis C virus infection
Source: PubMed Central journal article supplement (PMC3052717; doi:10.1099/vir.0.017699-0), 2010-06
Supplement: supp_91_6_1396__1.pdf [file supp_91_6_1396__1.pdf]

**Supplementary Table S1.** HCV core peptide amino acid sequences

| No. | Amino acid range | Sequence (5'→3')     |
|-----|------------------|----------------------|
| 1   | 1–20             | MSTNPKPQRKTKRNTNRRPQ |
| 2   | 11–30            | TKRNTNRRPQDVKFPGGGQI |
| 3   | 21–40            | DVKFPGGGQIVGGVYLLPRR |
| 4   | 31–50            | VGGVYLLPRRGPRLGVRATR |
| 5   | 41–60            | GPRLGVRATRKTSESRQPRG |
| 6   | 51–70            | KTSESRQPRGRRQPIPKARR |
| 7   | 61–80            | RRQPIPKARRPEGRTWAQPG |
| 8   | 71–90            | PEGRTWAQPGYPWPLYGNEG |
| 9   | 81–100           | YPWPLYGNEGCGWAGWLLSP |
| 10  | 91–110           | CGWAGWLLSPRGSRPSWGPT |
| 11  | 101–120          | RGSRPSWGPTDPRRRSRNLG |
| 12  | 111–130          | DPRRRSRNLGKVIDTLTCGF |
| 13  | 121–140          | KVIDTLTCGFADLMGYIPLV |
| 14  | 131–150          | ADLMGYIPLVGAPLGGAARA |
| 15  | 141–160          | GAPLGGAARALAHGVRVLED |
| 16  | 151–170          | LAHGVRVLEDGVNYATGNLP |
| 17  | 161–180          | GVNYATGNLPGCSFSIFLLA |
| 18  | 171–190          | GCSFSIFLLALLSCLTPAS  |
